# Supplementary material for: Discovering Pair-wise Synergies in Microarray Data
Source: PubMed Central journal article supplement (PMC4965793; doi:10.1038/srep30672), 2016-07-29
Supplement: srep30672-s1.pdf [file srep30672-s1.pdf]

# Discovering Pair-wise Synergies in Microarray Data

Yuan Chen <sup>1,2,+</sup>, Dan Cao <sup>3,+</sup>, Jun Gao <sup>4,5,\*</sup> and Zheming Yuan <sup>1,2,\*</sup>

Table S1: Top 200 genes indices selected by different methods from prostate1

|    | MIC <sub>Y-2X</sub> | MIC <sub>Y-X</sub> | mRMR  | RFE   | TSG   |
|----|---------------------|--------------------|-------|-------|-------|
| 1  | 2149                | 10494              | 6185  | 6185  | 143   |
| 2  | 8239                | 6185               | 11013 | 10537 | 1041  |
| 3  | 2181                | 9172               | 6145  | 10234 | 2078  |
| 4  | 11934               | 8965               | 12153 | 5045  | 2532  |
| 5  | 2326                | 12153              | 8878  | 497   | 2730  |
| 6  | 3043                | 9850               | 5890  | 4438  | 7264  |
| 7  | 500                 | 4365               | 7887  | 3649  | 7672  |
| 8  | 8539                | 12148              | 10553 | 7539  | 7986  |
| 9  | 2835                | 8554               | 7428  | 7139  | 8559  |
| 10 | 8633                | 10138              | 12098 | 205   | 8933  |
| 11 | 6731                | 8850               | 4285  | 6447  | 9129  |
| 12 | 7155                | 6462               | 9093  | 10215 | 10465 |
| 13 | 4554                | 7067               | 11942 | 6220  | 10670 |
| 14 | 10951               | 299                | 10996 | 11858 | 12082 |
| 15 | 5262                | 6620               | 10956 | 7875  | 12483 |
| 16 | 10823               | 7557               | 9505  | 2237  | 11215 |
| 17 | 9744                | 9093               | 6228  | 8123  | 4365  |
| 18 | 11170               | 9593               | 7775  | 5632  | 11871 |
| 19 | 10053               | 2839               | 12132 | 470   | 10494 |
| 20 | 12062               | 7247               | 4365  | 9178  | 8986  |
| 21 | 6982                | 5757               | 10234 | 7602  | 9354  |
| 22 | 11977               | 288                | 11818 | 4636  | 7905  |
| 23 | 4871                | 9034               | 9057  | 11942 | 5977  |
| 24 | 6386                | 3794               | 2760  | 8149  | 5757  |
| 25 | 139                 | 205                | 9172  | 7903  | 7315  |
| 26 | 1264                | 7756               | 6944  | 7623  | 8527  |
| 27 | 10139               | 10537              | 1388  | 9118  | 11818 |
| 28 | 11057               | 8631               | 8668  | 2371  | 8850  |
| 29 | 8198                | 6865               | 7930  | 12495 | 8199  |
| 30 | 10518               | 10614              | 5402  | 9900  | 11467 |
| 31 | 7503                | 3525               | 2500  | 9564  | 5944  |
| 32 | 8443                | 6866               | 9850  | 9172  | 8975  |
| 33 | 1411                | 7066               | 8741  | 1221  | 6359  |
| 34 | 4483                | 9341               | 7905  | 4282  | 2839  |
| 35 | 1611                | 3524               | 8258  | 5890  | 8058  |

---

|    |       |       |       |       |       |
|----|-------|-------|-------|-------|-------|
| 36 | 7555  | 8566  | 4928  | 12196 | 9034  |
| 37 | 7166  | 11942 | 8949  | 5952  | 4282  |
| 38 | 9170  | 942   | 10494 | 7298  | 9063  |
| 39 | 3636  | 3729  | 6390  | 7375  | 6185  |
| 40 | 8444  | 12495 | 6615  | 7896  | 11202 |
| 41 | 8177  | 4282  | 8516  | 7408  | 8200  |
| 42 | 3173  | 9050  | 10614 | 1490  | 4993  |
| 43 | 9242  | 10956 | 6556  | 7465  | 6462  |
| 44 | 780   | 5890  | 9173  | 12113 | 12148 |
| 45 | 9910  | 3649  | 6680  | 8498  | 12594 |
| 46 | 2292  | 6615  | 12148 | 4105  | 4513  |
| 47 | 891   | 6406  | 9442  | 9816  | 6930  |
| 48 | 11162 | 8058  | 8123  | 9044  | 2097  |
| 49 | 6468  | 1002  | 3703  | 1112  | 9442  |
| 50 | 5221  | 8011  | 270   | 7239  | 5155  |
| 51 | 5254  | 6941  | 6842  | 7067  | 8768  |
| 52 | 6560  | 6824  | 4243  | 4666  | 10112 |
| 53 | 10067 | 8306  | 6643  | 5991  | 8123  |
| 54 | 6685  | 5799  | 8631  | 11640 | 4772  |
| 55 | 7796  | 4690  | 7147  | 11263 | 5492  |
| 56 | 2014  | 6037  | 6011  | 10956 | 3703  |
| 57 | 9406  | 2279  | 1485  | 9593  | 2912  |
| 58 | 3533  | 6470  | 5989  | 8371  | 6108  |
| 59 | 4103  | 5761  | 6864  | 5661  | 3794  |
| 60 | 5021  | 6359  | 8868  | 11818 | 238   |
| 61 | 9270  | 3577  | 9034  | 7664  | 8528  |
| 62 | 6814  | 12132 | 1292  | 9034  | 6773  |
| 63 | 11871 | 9937  | 5241  | 11648 | 7465  |
| 64 | 3282  | 9039  | 9133  | 8902  | 10995 |
| 65 | 6220  | 10749 | 9576  | 9093  | 266   |
| 66 | 7174  | 329   | 12516 | 4069  | 8176  |
| 67 | 12266 | 11818 | 3525  | 4525  | 7735  |
| 68 | 11027 | 1203  | 3649  | 9039  | 2014  |
| 69 | 5697  | 5989  | 9937  | 9735  | 9195  |
| 70 | 8727  | 9063  | 205   | 6842  | 7428  |
| 71 | 5749  | 6390  | 5110  | 6145  | 10672 |
| 72 | 6306  | 7520  | 3570  | 11367 | 5821  |
| 73 | 6127  | 729   | 11871 | 9327  | 8083  |
| 74 | 10634 | 10550 | 2895  | 269   | 7157  |
| 75 | 6550  | 11064 | 288   | 8594  | 7185  |
| 76 | 11978 | 12594 | 10539 | 3794  | 7056  |
| 77 | 5647  | 11052 | 4804  | 5838  | 10677 |
| 78 | 7176  | 2797  | 4515  | 9133  | 1378  |
| 79 | 6899  | 5545  | 6406  | 4601  | 3879  |

---

---

|     |       |       |       |       |       |
|-----|-------|-------|-------|-------|-------|
| 80  | 3490  | 6497  | 5909  | 280   | 6941  |
| 81  | 5980  | 5835  | 7557  | 9850  | 5761  |
| 82  | 7284  | 11258 | 6381  | 5862  | 11216 |
| 83  | 8287  | 9174  | 6930  | 3765  | 1322  |
| 84  | 9809  | 10260 | 3794  | 11006 | 3570  |
| 85  | 954   | 5566  | 406   | 3617  | 6838  |
| 86  | 2942  | 9442  | 8200  | 8444  | 7437  |
| 87  | 1663  | 8200  | 6438  | 10732 | 7292  |
| 88  | 9203  | 3879  | 7500  | 12460 | 6470  |
| 89  | 7661  | 1256  | 9593  | 8610  | 10537 |
| 90  | 9453  | 8123  | 9195  | 9157  | 7405  |
| 91  | 2507  | 10996 | 7617  | 4960  | 9093  |
| 92  | 6438  | 8473  | 7717  | 10558 | 5574  |
| 93  | 7292  | 6765  | 9422  | 9403  | 9626  |
| 94  | 7337  | 8999  | 6865  | 8603  | 9230  |
| 95  | 8310  | 8018  | 6481  | 11258 | 6511  |
| 96  | 9486  | 7884  | 9267  | 10578 | 2443  |
| 97  | 10161 | 2977  | 5757  | 5042  | 10996 |
| 98  | 3153  | 10215 | 6561  | 8612  | 8387  |
| 99  | 4534  | 8589  | 8085  | 8368  | 5989  |
| 100 | 1963  | 10677 | 9911  | 12148 | 4726  |
| 101 | 9032  | 590   | 11315 | 6462  | 6512  |
| 102 | 10417 | 9057  | 12051 | 7329  | 7623  |
| 103 | 3302  | 8067  | 12352 | 6360  | 4514  |
| 104 | 4409  | 8277  | 8965  | 3741  | 7067  |
| 105 | 5098  | 8074  | 8306  | 1613  | 6037  |
| 106 | 11764 | 9635  | 4282  | 11871 | 8591  |
| 107 | 8293  | 7821  | 1806  | 4905  | 9215  |
| 108 | 9617  | 8729  | 11644 | 8026  | 10383 |
| 109 | 3062  | 8527  | 4514  | 12153 | 8330  |
| 110 | 6719  | 11240 | 8367  | 9331  | 7952  |
| 111 | 8780  | 7820  | 5045  | 9964  | 10358 |
| 112 | 7327  | 9048  | 11858 | 4319  | 7791  |
| 113 | 9000  | 7469  | 8970  | 2839  | 4723  |
| 114 | 6392  | 8889  | 8615  | 44    | 12454 |
| 115 | 7766  | 5262  | 8851  | 8981  | 11854 |
| 116 | 5693  | 10907 | 10138 | 10092 | 12256 |
| 117 | 4636  | 7772  | 3834  | 7482  | 10106 |
| 118 | 5887  | 9176  | 959   | 1860  | 8724  |
| 119 | 6938  | 12545 | 283   | 5524  | 6392  |
| 120 | 9065  | 5508  | 7623  | 6063  | 8455  |
| 121 | 711   | 8952  | 7943  | 9410  | 4417  |
| 122 | 6894  | 4241  | 10465 | 9295  | 7913  |
| 123 | 9185  | 12414 | 5944  | 10207 | 6643  |

---

---

|     |       |       |       |       |       |
|-----|-------|-------|-------|-------|-------|
| 124 | 11805 | 6119  | 2791  | 11403 | 5684  |
| 125 | 4971  | 9599  | 8270  | 8200  | 10439 |
| 126 | 11252 | 10840 | 7519  | 7265  | 7896  |
| 127 | 5882  | 2760  | 2985  | 8943  | 1761  |
| 128 | 8056  | 7905  | 9255  | 5707  | 769   |
| 129 | 5831  | 6237  | 5401  | 4751  | 10092 |
| 130 | 1793  | 9897  | 6645  | 6066  | 3985  |
| 131 | 876   | 3768  | 5792  | 6688  | 3780  |
| 132 | 8323  | 12203 | 11467 | 10162 | 12455 |
| 133 | 8981  | 6394  | 4618  | 9291  | 7272  |
| 134 | 8236  | 1219  | 6765  | 8818  | 5283  |
| 135 | 512   | 996   | 8651  | 9470  | 11073 |
| 136 | 11501 | 6033  | 6037  | 6200  | 7068  |
| 137 | 1604  | 10553 | 8900  | 3566  | 2873  |
| 138 | 2625  | 6933  | 4726  | 6024  | 9341  |
| 139 | 7719  | 8186  | 9900  | 163   | 6745  |
| 140 | 9330  | 6995  | 9050  | 2764  | 10907 |
| 141 | 3449  | 8552  | 8552  | 11467 | 8747  |
| 142 | 4616  | 2791  | 11577 | 9104  | 9850  |
| 143 | 5587  | 6266  | 10995 | 12600 | 12098 |
| 144 | 7032  | 266   | 4970  | 9661  | 8741  |
| 145 | 11016 | 11215 | 10979 | 5629  | 996   |
| 146 | 6759  | 12448 | 8975  | 8928  | 8517  |
| 147 | 7261  | 549   | 4856  | 8817  | 306   |
| 148 | 1131  | 4833  | 7588  | 4365  | 6301  |
| 149 | 5955  | 12352 | 7992  | 10875 | 7884  |
| 150 | 1401  | 7165  | 8407  | 3938  | 7946  |
| 151 | 10594 | 6659  | 1958  | 7505  | 6575  |
| 152 | 6709  | 8103  | 4022  | 4243  | 10056 |
| 153 | 10868 | 8916  | 4473  | 8393  | 7958  |
| 154 | 9511  | 10234 | 8594  | 6390  | 11858 |
| 155 | 12416 | 11467 | 9039  | 10658 | 6766  |
| 156 | 8311  | 4285  | 4577  | 2245  | 6866  |
| 157 | 12053 | 7532  | 7247  | 4804  | 47    |
| 158 | 4292  | 3160  | 3394  | 6083  | 6237  |
| 159 | 4388  | 9412  | 10537 | 7181  | 2191  |
| 160 | 7396  | 6176  | 8249  | 5110  | 7746  |
| 161 | 8694  | 8498  | 6118  | 6228  | 8716  |
| 162 | 10128 | 2681  | 7550  | 4380  | 10417 |
| 163 | 10380 | 10261 | 7048  | 11849 | 9791  |
| 164 | 6460  | 4964  | 9828  | 6650  | 2074  |
| 165 | 10698 | 4805  | 5954  | 7198  | 549   |
| 166 | 3918  | 7946  | 8961  | 3402  | 8495  |
| 167 | 6980  | 8407  | 9604  | 7304  | 7624  |

---

|     |       |       |       |       |       |
|-----|-------|-------|-------|-------|-------|
| 168 | 2170  | 6643  | 7451  | 11920 | 11932 |
| 169 | 6955  | 7715  | 6359  | 9308  | 9235  |
| 170 | 8499  | 8953  | 942   | 3525  | 4535  |
| 171 | 12426 | 9354  | 5262  | 4899  | 721   |
| 172 | 9184  | 4737  | 3912  | 10951 | 6263  |
| 173 | 10350 | 1370  | 3120  | 3448  | 6484  |
| 174 | 652   | 6438  | 7067  | 2247  | 939   |
| 175 | 6646  | 6145  | 8498  | 1212  | 4042  |
| 176 | 5314  | 8668  | 4525  | 9047  | 8019  |
| 177 | 8009  | 6930  | 4949  | 12403 | 9876  |
| 178 | 11334 | 6011  | 12455 | 8965  | 12378 |
| 179 | 6440  | 6715  | 8058  | 8878  | 10505 |
| 180 | 9646  | 7229  | 1399  | 7079  | 6963  |
| 181 | 7319  | 11202 | 5091  | 6037  | 4648  |
| 182 | 822   | 4856  | 8793  | 7527  | 8958  |
| 183 | 6218  | 11350 | 9770  | 11345 | 7539  |
| 184 | 3238  | 7428  | 10481 | 8499  | 12399 |
| 185 | 9357  | 8673  | 7722  | 8768  | 5402  |
| 186 | 9381  | 5418  | 11756 | 11791 | 8043  |
| 187 | 5571  | 146   | 6838  | 7637  | 10916 |
| 188 | 5632  | 7765  | 10840 | 10292 | 11013 |
| 189 | 639   | 6909  | 7618  | 11857 | 6645  |
| 190 | 8814  | 6690  | 5291  | 7982  | 11593 |
| 191 | 10840 | 8690  | 7896  | 9892  | 5791  |
| 192 | 6513  | 9411  | 10547 | 7757  | 6908  |
| 193 | 11326 | 7775  | 5029  | 10417 | 4243  |
| 194 | 1508  | 8664  | 1941  | 4995  | 6944  |
| 195 | 5362  | 8890  | 9470  | 9976  | 10202 |
| 196 | 11407 | 8387  | 5761  | 10677 | 4905  |
| 197 | 8844  | 8975  | 8767  | 3703  | 8641  |
| 198 | 10037 | 12305 | 5462  | 11879 | 8294  |
| 199 | 4425  | 3834  | 4278  | 9671  | 12280 |
| 200 | 8205  | 4989  | 11932 | 11787 | 12268 |

The number means the location of introducing genes in original dataset.

Table S2: Top 200 genes indices selected by different methods from DLBCL.

|   | $MIC_{Y-2X}$ | $MIC_{Y-X}$ | mRMR | RFE  | TSG  |
|---|--------------|-------------|------|------|------|
| 1 | 155          | 506         | 1352 | 2006 | 5934 |
| 2 | 364          | 2988        | 2928 | 555  | 7091 |
| 3 | 4814         | 972         | 5292 | 5130 | 5867 |
| 4 | 6974         | 4453        | 87   | 5648 | 2137 |
| 5 | 905          | 4202        | 4256 | 699  | 1055 |
| 6 | 6804         | 5409        | 5518 | 7102 | 5930 |

---

|    |      |      |      |      |      |
|----|------|------|------|------|------|
| 7  | 3162 | 1092 | 6645 | 2609 | 2937 |
| 8  | 5890 | 2043 | 5054 | 3791 | 2100 |
| 9  | 1019 | 5867 | 4453 | 3015 | 2912 |
| 10 | 4925 | 5077 | 5648 | 4070 | 1823 |
| 11 | 2671 | 6179 | 5595 | 613  | 6524 |
| 12 | 5590 | 2789 | 578  | 6055 | 87   |
| 13 | 3012 | 5882 | 4943 | 4194 | 582  |
| 14 | 3816 | 4028 | 613  | 4050 | 5175 |
| 15 | 253  | 4485 | 5616 | 3361 | 373  |
| 16 | 3699 | 4292 | 3414 | 5077 | 4183 |
| 17 | 3778 | 1480 | 203  | 2092 | 1221 |
| 18 | 4969 | 1055 | 5198 | 86   | 4273 |
| 19 | 2733 | 582  | 5077 | 4971 | 4339 |
| 20 | 3601 | 5054 | 1480 | 6573 | 4372 |
| 21 | 687  | 3535 | 2392 | 6730 | 5280 |
| 22 | 2676 | 1430 | 5882 | 2044 | 302  |
| 23 | 3200 | 4024 | 4008 | 6575 | 3684 |
| 24 | 976  | 1352 | 5386 | 1039 | 5967 |
| 25 | 4426 | 1670 | 2308 | 5183 | 972  |
| 26 | 1878 | 302  | 2128 | 3215 | 2421 |
| 27 | 4757 | 1818 | 637  | 74   | 1412 |
| 28 | 330  | 486  | 1055 | 1665 | 3736 |
| 29 | 6744 | 2100 | 6580 | 1612 | 1969 |
| 30 | 889  | 5994 | 2064 | 6770 | 5594 |
| 31 | 1075 | 2137 | 4194 | 4903 | 2988 |
| 32 | 1420 | 4010 | 2121 | 4374 | 1373 |
| 33 | 289  | 2657 | 4463 | 3408 | 4330 |
| 34 | 464  | 4580 | 2614 | 6168 | 4680 |
| 35 | 3170 | 6295 | 4856 | 4584 | 4130 |
| 36 | 5461 | 605  | 4354 | 1352 | 2901 |
| 37 | 935  | 3639 | 4028 | 4453 | 2761 |
| 38 | 6323 | 2306 | 2006 | 3119 | 6023 |
| 39 | 2414 | 4545 | 2306 | 3011 | 3693 |
| 40 | 4693 | 6476 | 7102 | 3724 | 605  |
| 41 | 936  | 6703 | 1221 | 4032 | 1934 |
| 42 | 1834 | 203  | 4553 | 7037 | 2941 |
| 43 | 5464 | 1693 | 5124 | 4454 | 3155 |
| 44 | 4283 | 5130 | 4156 | 2482 | 4970 |
| 45 | 4650 | 5629 | 2933 | 6725 | 1119 |
| 46 | 2278 | 104  | 171  | 3660 | 4153 |
| 47 | 6527 | 6493 | 6179 | 4234 | 4272 |
| 48 | 4287 | 3398 | 6725 | 5871 | 349  |
| 49 | 6779 | 356  | 4340 | 6601 | 6716 |
| 50 | 2888 | 6385 | 5322 | 2797 | 951  |

---

---

|    |      |      |      |      |      |
|----|------|------|------|------|------|
| 51 | 6059 | 1373 | 339  | 4784 | 1860 |
| 52 | 217  | 834  | 585  | 6591 | 7005 |
| 53 | 1102 | 4153 | 1439 | 4459 | 1016 |
| 54 | 3147 | 1704 | 4903 | 372  | 3791 |
| 55 | 2948 | 880  | 3409 | 1818 | 486  |
| 56 | 3218 | 1860 | 5998 | 2128 | 4812 |
| 57 | 3278 | 3120 | 1760 | 4142 | 3461 |
| 58 | 6625 | 5088 | 6377 | 3151 | 203  |
| 59 | 1455 | 7008 | 3121 | 6493 | 5031 |
| 60 | 1284 | 6606 | 5388 | 779  | 1200 |
| 61 | 3981 | 4503 | 2244 | 3622 | 1829 |
| 62 | 2095 | 1132 | 6795 | 801  | 5819 |
| 63 | 6839 | 4372 | 484  | 1585 | 5242 |
| 64 | 4803 | 2761 | 1612 | 6570 | 6250 |
| 65 | 3276 | 6524 | 1930 | 2937 | 4453 |
| 66 | 4363 | 3008 | 1984 | 6524 | 5409 |
| 67 | 335  | 6047 | 2433 | 3878 | 6834 |
| 68 | 5718 | 1188 | 942  | 3818 | 492  |
| 69 | 1154 | 3861 | 699  | 3053 | 2493 |
| 70 | 5300 | 7091 | 2452 | 5552 | 3494 |
| 71 | 648  | 87   | 5193 | 2121 | 5480 |
| 72 | 5075 | 47   | 2401 | 4230 | 5388 |
| 73 | 470  | 3283 | 2837 | 6323 | 3499 |
| 74 | 4201 | 2121 | 276  | 4518 | 2557 |
| 75 | 2342 | 373  | 5935 | 1177 | 5136 |
| 76 | 7010 | 4991 | 2164 | 1128 | 163  |
| 77 | 717  | 5935 | 2656 | 5464 | 506  |
| 78 | 6410 | 349  | 4116 | 5930 | 5077 |
| 79 | 745  | 5637 | 5967 | 760  | 4024 |
| 80 | 4708 | 5998 | 4038 | 3515 | 6304 |
| 81 | 731  | 2392 | 2669 | 6154 | 4780 |
| 82 | 2054 | 4680 | 1385 | 87   | 2309 |
| 83 | 1233 | 2383 | 5972 | 574  | 1780 |
| 84 | 4885 | 1166 | 1959 | 778  | 4503 |
| 85 | 2583 | 562  | 1163 | 3903 | 1430 |
| 86 | 6541 | 5579 | 4546 | 3909 | 6191 |
| 87 | 891  | 438  | 6606 | 6141 | 3868 |
| 88 | 1145 | 4339 | 5497 | 5846 | 1225 |
| 89 | 5272 | 385  | 1200 | 6359 | 6140 |
| 90 | 2603 | 4463 | 1154 | 4747 | 1607 |
| 91 | 4868 | 1119 | 3499 | 930  | 2527 |
| 92 | 5064 | 6725 | 4090 | 4028 | 4110 |
| 93 | 6391 | 4194 | 6730 | 4435 | 2319 |
| 94 | 1330 | 4061 | 3732 | 1188 | 4567 |

---

---

|     |      |      |      |      |      |
|-----|------|------|------|------|------|
| 95  | 3738 | 555  | 4050 | 1995 | 5336 |
| 96  | 3172 | 6549 | 4410 | 360  | 4254 |
| 97  | 3706 | 4116 | 5505 | 1455 | 2669 |
| 98  | 3179 | 1024 | 5938 | 3086 | 1350 |
| 99  | 3471 | 4183 | 3624 | 6784 | 640  |
| 100 | 7033 | 6815 | 6113 | 6644 | 778  |
| 101 | 878  | 6603 | 686  | 3112 | 699  |
| 102 | 2704 | 3005 | 2657 | 6040 | 337  |
| 103 | 6512 | 2883 | 1818 | 1201 | 4485 |
| 104 | 3720 | 316  | 412  | 7036 | 4033 |
| 105 | 6842 | 3461 | 4768 | 3913 | 3921 |
| 106 | 5445 | 5956 | 5130 | 2403 | 2789 |
| 107 | 5475 | 833  | 3709 | 1027 | 4131 |
| 108 | 5362 | 1952 | 6102 | 6537 | 3887 |
| 109 | 245  | 5688 | 3545 | 4569 | 4194 |
| 110 | 6308 | 1272 | 5956 | 2580 | 2907 |
| 111 | 111  | 5175 | 1462 | 1838 | 3639 |
| 112 | 227  | 5436 | 6321 | 2497 | 438  |
| 113 | 352  | 275  | 4729 | 5600 | 6784 |
| 114 | 6483 | 1367 | 6504 | 4729 | 562  |
| 115 | 4612 | 2363 | 6892 | 4658 | 2392 |
| 116 | 6803 | 1790 | 3637 | 6928 | 2306 |
| 117 | 1571 | 4340 | 4087 | 5250 | 3535 |
| 118 | 2230 | 798  | 6056 | 5984 | 3545 |
| 119 | 4563 | 3693 | 2626 | 140  | 3557 |
| 120 | 7002 | 1138 | 6012 | 1781 | 6295 |
| 121 | 1914 | 6196 | 1994 | 1430 | 1231 |
| 122 | 6324 | 2929 | 3786 | 1480 | 3387 |
| 123 | 2477 | 6986 | 506  | 4184 | 2132 |
| 124 | 4397 | 322  | 4332 | 4138 | 2564 |
| 125 | 2651 | 4306 | 1790 | 2642 | 3038 |
| 126 | 3033 | 4418 | 4993 | 4751 | 1514 |
| 127 | 3236 | 4725 | 441  | 3997 | 1080 |
| 128 | 3056 | 2912 | 5973 | 4949 | 200  |
| 129 | 3810 | 1090 | 1667 | 3138 | 880  |
| 130 | 719  | 3163 | 4817 | 4430 | 3201 |
| 131 | 7063 | 2030 | 2522 | 2901 | 6196 |
| 132 | 6732 | 2128 | 335  | 2789 | 405  |
| 133 | 3851 | 4236 | 4580 | 2161 | 5088 |
| 134 | 4623 | 4734 | 1252 | 6192 | 4765 |
| 135 | 6731 | 2380 | 49   | 5148 | 1245 |
| 136 | 1812 | 5094 | 6940 | 4039 | 3637 |
| 137 | 6054 | 5704 | 6815 | 1003 | 1409 |
| 138 | 3420 | 3537 | 7005 | 989  | 7051 |

---



---

|     |      |      |      |      |      |
|-----|------|------|------|------|------|
| 139 | 5785 | 282  | 5233 | 497  | 5695 |
| 140 | 301  | 6674 | 4518 | 1221 | 4546 |
| 141 | 3642 | 4459 | 6050 | 592  | 1238 |
| 142 | 3452 | 3818 | 386  | 6564 | 5539 |
| 143 | 4793 | 5706 | 5564 | 1670 | 5888 |
| 144 | 4396 | 989  | 6300 | 2140 | 6165 |
| 145 | 243  | 1245 | 6885 | 6236 | 5054 |
| 146 | 5026 | 3445 | 2102 | 2337 | 104  |
| 147 | 230  | 3181 | 5379 | 2352 | 1612 |
| 148 | 2274 | 1157 | 6553 | 3299 | 3121 |
| 149 | 5944 | 2669 | 1829 | 3266 | 1942 |
| 150 | 3896 | 1667 | 5119 | 401  | 2282 |
| 151 | 5434 | 3508 | 1718 | 5338 | 6476 |
| 152 | 4169 | 4520 | 544  | 4928 | 173  |
| 153 | 5223 | 4131 | 3099 | 5848 | 6507 |
| 154 | 1275 | 759  | 1201 | 6868 | 2000 |
| 155 | 2956 | 7005 | 3818 | 5456 | 4983 |
| 156 | 903  | 5608 | 2789 | 373  | 1252 |
| 157 | 6882 | 2459 | 6280 | 6525 | 228  |
| 158 | 1774 | 1783 | 3053 | 4042 | 5124 |
| 159 | 3578 | 1825 | 502  | 2205 | 440  |
| 160 | 3242 | 323  | 191  | 232  | 6659 |
| 161 | 7032 | 4887 | 1248 | 3545 | 6587 |
| 162 | 5982 | 7042 | 4307 | 6163 | 1435 |
| 163 | 6417 | 4242 | 5583 | 2457 | 573  |
| 164 | 1972 | 6522 | 4125 | 1693 | 3953 |
| 165 | 153  | 5804 | 2664 | 882  | 7117 |
| 166 | 581  | 1080 | 438  | 3628 | 6493 |
| 167 | 1995 | 3387 | 5139 | 7045 | 5119 |
| 168 | 4299 | 3736 | 1747 | 2761 | 5743 |
| 169 | 3004 | 405  | 4544 | 6246 | 3383 |
| 170 | 2737 | 1016 | 4689 | 1367 | 5518 |
| 171 | 6074 | 2525 | 1364 | 3535 | 6368 |
| 172 | 1324 | 1643 | 6716 | 3388 | 4202 |
| 173 | 6683 | 3669 | 1109 | 4619 | 5971 |
| 174 | 2458 | 4330 | 1585 | 5785 | 7123 |
| 175 | 2576 | 218  | 6681 | 1234 | 658  |
| 176 | 4263 | 699  | 1225 | 4497 | 3917 |
| 177 | 6057 | 3140 | 6658 | 5054 | 5234 |
| 178 | 2949 | 1110 | 4242 | 1708 | 469  |
| 179 | 5155 | 1400 | 3432 | 506  | 4094 |
| 180 | 829  | 5480 | 5028 | 1544 | 5258 |
| 181 | 5797 | 879  | 1505 | 4233 | 214  |
| 182 | 4250 | 6110 | 1043 | 3942 | 1693 |

---

|     |      |      |      |      |      |
|-----|------|------|------|------|------|
| 183 | 6877 | 4667 | 147  | 1120 | 4385 |
| 184 | 1495 | 5518 | 6144 | 5434 | 3665 |
| 185 | 6403 | 4970 | 6542 | 6565 | 1098 |
| 186 | 1116 | 1969 | 1216 | 1622 | 2030 |
| 187 | 4749 | 5876 | 1132 | 4292 | 6591 |
| 188 | 1044 | 1217 | 6085 | 464  | 1543 |
| 189 | 2072 | 2821 | 5867 | 5713 | 5966 |
| 190 | 2328 | 4110 | 6480 | 5166 | 4032 |
| 191 | 4067 | 171  | 3469 | 1887 | 5936 |
| 192 | 363  | 2941 | 4117 | 5952 | 5840 |
| 193 | 4345 | 2031 | 4328 | 5300 | 1894 |
| 194 | 727  | 4374 | 2487 | 3387 | 1523 |
| 195 | 2670 | 4343 | 5450 | 3926 | 445  |
| 196 | 347  | 441  | 1694 | 6790 | 6113 |
| 197 | 4403 | 6591 | 4406 | 4395 | 1259 |
| 198 | 4514 | 1472 | 1148 | 2929 | 259  |
| 199 | 763  | 3698 | 1102 | 6167 | 306  |
| 200 | 807  | 4025 | 5695 | 6293 | 386  |

Table S3: Top 200 genes indices selected by different methods from Lung1.

|    | $MIC_{Y-2X}$ | $MIC_{Y-X}$ | mRMR  | RFE   | TSG   |
|----|--------------|-------------|-------|-------|-------|
| 1  | 3380         | 7200        | 12114 | 7200  | 2421  |
| 2  | 3742         | 7765        | 11328 | 5393  | 5301  |
| 3  | 7393         | 2421        | 3333  | 4336  | 6139  |
| 4  | 9959         | 541         | 718   | 12308 | 12114 |
| 5  | 3271         | 6571        | 10508 | 12079 | 3916  |
| 6  | 7392         | 8005        | 2549  | 12532 | 11957 |
| 7  | 6618         | 8180        | 12196 | 3334  | 7046  |
| 8  | 10465        | 3333        | 2245  | 3508  | 8005  |
| 9  | 2703         | 8886        | 3334  | 2627  | 718   |
| 10 | 4937         | 2549        | 6571  | 11831 | 5979  |
| 11 | 8649         | 3844        | 2255  | 3391  | 8537  |
| 12 | 9925         | 3250        | 3902  | 2255  | 12152 |
| 13 | 4780         | 4336        | 11831 | 5356  | 2378  |
| 14 | 5849         | 11015       | 11015 | 3506  | 3389  |
| 15 | 7028         | 8370        | 11292 | 12277 | 4083  |
| 16 | 2303         | 12114       | 4336  | 9365  | 1271  |
| 17 | 7620         | 5301        | 9465  | 2720  | 1182  |
| 18 | 3384         | 12200       | 3844  | 6164  | 1246  |
| 19 | 10713        | 9607        | 10519 | 1431  | 6571  |
| 20 | 6626         | 869         | 667   | 9818  | 8886  |
| 21 | 7404         | 3334        | 3250  | 11015 | 7249  |

---

|    |       |       |       |       |       |
|----|-------|-------|-------|-------|-------|
| 22 | 3887  | 7249  | 7625  | 6584  | 6629  |
| 23 | 9171  | 3361  | 11958 | 4368  | 11292 |
| 24 | 3219  | 12298 | 6164  | 8564  | 2549  |
| 25 | 7796  | 9707  | 7849  | 11828 | 3337  |
| 26 | 1679  | 3916  | 11052 | 8005  | 11470 |
| 27 | 4355  | 11926 | 11926 | 9228  | 633   |
| 28 | 6926  | 9474  | 10870 | 3824  | 6241  |
| 29 | 8555  | 11470 | 1271  | 9823  | 5229  |
| 30 | 4371  | 1246  | 8005  | 5337  | 12153 |
| 31 | 9420  | 633   | 9228  | 11470 | 3764  |
| 32 | 8854  | 9863  | 3202  | 11328 | 799   |
| 33 | 12462 | 1192  | 1222  | 3509  | 3287  |
| 34 | 2736  | 11958 | 11841 | 7795  | 400   |
| 35 | 10542 | 3902  | 12298 | 541   | 8842  |
| 36 | 9974  | 7748  | 6139  | 6180  | 541   |
| 37 | 11402 | 11957 | 7765  | 9043  | 6734  |
| 38 | 4583  | 667   | 12308 | 9371  | 3250  |
| 39 | 9439  | 1271  | 2624  | 9299  | 3383  |
| 40 | 692   | 8537  | 11671 | 7729  | 9999  |
| 41 | 10909 | 10519 | 425   | 5854  | 3333  |
| 42 | 4661  | 6139  | 7748  | 2549  | 11926 |
| 43 | 8996  | 11841 | 3912  | 12215 | 667   |
| 44 | 2555  | 9698  | 8537  | 3279  | 5356  |
| 45 | 10835 | 5979  | 8370  | 4480  | 7765  |
| 46 | 8415  | 2378  | 3789  | 182   | 12200 |
| 47 | 10563 | 5806  | 2244  | 5835  | 9312  |
| 48 | 9053  | 12360 | 1146  | 8858  | 4     |
| 49 | 9079  | 9824  | 7200  | 3278  | 5751  |
| 50 | 4823  | 4772  | 1143  | 2039  | 4243  |
| 51 | 8521  | 2039  | 4368  | 7706  | 8080  |
| 52 | 9672  | 2122  | 9607  | 799   | 7327  |
| 53 | 12433 | 2787  | 3361  | 1949  | 2787  |
| 54 | 4375  | 9823  | 11830 | 8178  | 6600  |
| 55 | 5463  | 12523 | 6405  | 9855  | 3945  |
| 56 | 6166  | 12186 | 9823  | 1192  | 7059  |
| 57 | 9015  | 12254 | 5301  | 8172  | 2882  |
| 58 | 3837  | 9765  | 7234  | 4     | 5104  |
| 59 | 10966 | 7046  | 633   | 8247  | 4124  |
| 60 | 4466  | 11671 | 12200 | 9142  | 10519 |
| 61 | 4493  | 3383  | 8180  | 2331  | 7200  |
| 62 | 5910  | 1431  | 6304  | 1673  | 9765  |
| 63 | 7337  | 11858 | 9229  | 2769  | 333   |
| 64 | 10105 | 12308 | 9818  | 5793  | 8370  |
| 65 | 10977 | 6405  | 12186 | 12078 | 7160  |

---

---

|     |       |       |       |       |       |
|-----|-------|-------|-------|-------|-------|
| 66  | 2583  | 6821  | 3861  | 9452  | 92    |
| 67  | 5673  | 3912  | 2205  | 399   | 7678  |
| 68  | 5348  | 1182  | 3381  | 4202  | 2894  |
| 69  | 11189 | 5356  | 8697  | 1222  | 3513  |
| 70  | 7299  | 6185  | 11470 | 3844  | 10386 |
| 71  | 5338  | 2255  | 7249  | 7074  | 12239 |
| 72  | 2995  | 11368 | 7795  | 6261  | 3490  |
| 73  | 10177 | 7722  | 9707  | 10219 | 12186 |
| 74  | 6374  | 8709  | 1223  | 6571  | 11858 |
| 75  | 8013  | 5104  | 2039  | 6998  | 11671 |
| 76  | 1248  | 5847  | 7000  | 5958  | 4335  |
| 77  | 7759  | 6241  | 4815  | 6047  | 8315  |
| 78  | 6127  | 7849  | 2062  | 9824  | 4119  |
| 79  | 10362 | 9843  | 12407 | 1085  | 329   |
| 80  | 2845  | 12196 | 869   | 1612  | 7991  |
| 81  | 9969  | 9999  | 3764  | 1545  | 8451  |
| 82  | 5570  | 11392 | 3906  | 11914 | 2806  |
| 83  | 11541 | 718   | 1673  | 7765  | 7891  |
| 84  | 9144  | 3202  | 2882  | 1082  | 11246 |
| 85  | 10919 | 11955 | 7891  | 8179  | 2907  |
| 86  | 2812  | 3931  | 5806  | 3333  | 4502  |
| 87  | 12460 | 5793  | 11770 | 2240  | 7849  |
| 88  | 1206  | 3764  | 5847  | 7140  | 7453  |
| 89  | 4260  | 333   | 646   | 1611  | 1024  |
| 90  | 9591  | 2205  | 1193  | 5276  | 12298 |
| 91  | 6693  | 8126  | 3931  | 598   | 11770 |
| 92  | 1270  | 6304  | 7722  | 7625  | 10712 |
| 93  | 8896  | 4335  | 2421  | 7386  | 630   |
| 94  | 1700  | 11831 | 2669  | 6405  | 11507 |
| 95  | 8024  | 11258 | 8564  | 9229  | 11914 |
| 96  | 2967  | 4083  | 3508  | 12298 | 7396  |
| 97  | 5211  | 2624  | 11957 | 1677  | 6581  |
| 98  | 1470  | 92    | 541   | 8275  | 12216 |
| 99  | 7745  | 2882  | 2787  | 1126  | 3122  |
| 100 | 949   | 182   | 8126  | 522   | 2624  |
| 101 | 11998 | 3513  | 9698  | 4711  | 6304  |
| 102 | 1157  | 1611  | 12360 | 11355 | 8748  |
| 103 | 10997 | 1673  | 8172  | 5323  | 12242 |
| 104 | 3177  | 10020 | 10843 | 3912  | 8379  |
| 105 | 9076  | 12020 | 1127  | 6241  | 7048  |
| 106 | 4338  | 7160  | 11368 | 5330  | 7748  |
| 107 | 12422 | 11292 | 1431  | 8370  | 11955 |
| 108 | 4781  | 3508  | 4772  | 12343 | 3361  |
| 109 | 7855  | 6734  | 7080  | 7048  | 10471 |

---

---

|     |       |       |       |       |       |
|-----|-------|-------|-------|-------|-------|
| 110 | 6613  | 4815  | 8275  | 12395 | 4108  |
| 111 | 9996  | 3381  | 1545  | 4906  | 6914  |
| 112 | 10910 | 12464 | 2735  | 8537  | 12464 |
| 113 | 10369 | 3389  | 9824  | 7500  | 47    |
| 114 | 12197 | 6164  | 7069  | 2150  | 1301  |
| 115 | 2570  | 8564  | 5104  | 11628 | 12523 |
| 116 | 5224  | 10386 | 9299  | 4819  | 9609  |
| 117 | 5055  | 4424  | 5356  | 3211  | 4821  |
| 118 | 10011 | 4     | 9034  | 2507  | 5232  |
| 119 | 3347  | 1612  | 6094  | 1254  | 11485 |
| 120 | 7618  | 5783  | 8451  | 11368 | 10157 |
| 121 | 3972  | 8108  | 8376  | 6262  | 8638  |
| 122 | 5851  | 1782  | 9772  | 9785  | 2122  |
| 123 | 7254  | 11857 | 1182  | 12196 | 4190  |
| 124 | 3534  | 7625  | 7894  | 3789  | 3737  |
| 125 | 4456  | 8393  | 9758  | 3166  | 1227  |
| 126 | 3244  | 12407 | 2238  | 329   | 9371  |
| 127 | 6595  | 400   | 3383  | 8488  | 9683  |
| 128 | 10448 | 2822  | 9019  | 12407 | 9115  |
| 129 | 11340 | 799   | 8669  | 5301  | 9698  |
| 130 | 3097  | 34    | 8393  | 846   | 956   |
| 131 | 8398  | 3490  | 1192  | 12210 | 12306 |
| 132 | 6854  | 6533  | 8694  | 11680 | 7444  |
| 133 | 9401  | 6600  | 6953  | 9707  | 9772  |
| 134 | 6644  | 6733  | 9683  | 6270  | 4319  |
| 135 | 9393  | 8172  | 9244  | 1179  | 2237  |
| 136 | 9796  | 5248  | 6189  | 11050 | 9365  |
| 137 | 10063 | 10471 | 846   | 11830 | 9299  |
| 138 | 8723  | 5853  | 8858  | 10284 | 6733  |
| 139 | 12515 | 2806  | 10386 | 4348  | 2822  |
| 140 | 8046  | 10712 | 12464 | 5757  | 12360 |
| 141 | 10782 | 8842  | 10926 | 6749  | 9446  |
| 142 | 10363 | 47    | 5853  | 7748  | 8069  |
| 143 | 12507 | 6017  | 9728  | 7234  | 3381  |
| 144 | 3149  | 8080  | 5393  | 4174  | 9351  |
| 145 | 11759 | 11485 | 1858  | 2172  | 4795  |
| 146 | 2680  | 4502  | 9843  | 3361  | 6128  |
| 147 | 3355  | 1136  | 7160  | 992   | 11841 |
| 148 | 8922  | 9683  | 4194  | 12384 | 9677  |
| 149 | 10904 | 6094  | 9863  | 7327  | 1464  |
| 150 | 12222 | 6581  | 1612  | 9068  | 5803  |
| 151 | 11854 | 9772  | 10912 | 3591  | 4194  |
| 152 | 7445  | 5835  | 3455  | 11841 | 10805 |
| 153 | 12105 | 10843 | 4     | 1151  | 9311  |

---

---

|     |       |       |       |       |       |
|-----|-------|-------|-------|-------|-------|
| 154 | 5524  | 9857  | 7046  | 2721  | 7007  |
| 155 | 10271 | 2077  | 6734  | 10925 | 503   |
| 156 | 4912  | 8909  | 10174 | 3202  | 11958 |
| 157 | 10848 | 7007  | 7798  | 1578  | 1739  |
| 158 | 4001  | 4821  | 1611  | 5806  | 5826  |
| 159 | 9759  | 9229  | 5854  | 9489  | 8765  |
| 160 | 2257  | 8858  | 7368  | 935   | 5383  |
| 161 | 2946  | 10290 | 7700  | 2234  | 8065  |
| 162 | 7139  | 3114  | 6629  | 6240  | 12207 |
| 163 | 7843  | 7080  | 647   | 647   | 4874  |
| 164 | 2595  | 11616 | 3278  | 1223  | 8524  |
| 165 | 197   | 11856 | 4174  | 5853  | 7184  |
| 166 | 8827  | 12152 | 3412  | 11529 | 11856 |
| 167 | 2513  | 4368  | 182   | 138   | 3913  |
| 168 | 10597 | 6576  | 10722 | 10640 | 10020 |
| 169 | 4685  | 1146  | 1136  | 1236  | 3845  |
| 170 | 10748 | 9312  | 5979  | 7917  | 3411  |
| 171 | 2125  | 6748  | 5796  | 2748  | 11857 |
| 172 | 9352  | 734   | 343   | 752   | 7924  |
| 173 | 7930  | 3287  | 11281 | 6551  | 102   |
| 174 | 4699  | 12216 | 8494  | 11958 | 11669 |
| 175 | 10761 | 12173 | 11171 | 7131  | 2234  |
| 176 | 5408  | 7069  | 3287  | 2521  | 1027  |
| 177 | 9697  | 11257 | 11392 | 1985  | 6971  |
| 178 | 545   | 2669  | 7678  | 4090  | 5051  |
| 179 | 959   | 10062 | 1444  | 521   | 6821  |
| 180 | 8021  | 11529 | 4202  | 10346 | 7722  |
| 181 | 3616  | 8524  | 10977 | 8780  | 1574  |
| 182 | 8724  | 8843  | 2221  | 6691  | 12138 |
| 183 | 5316  | 4119  | 4874  | 4829  | 10469 |
| 184 | 5821  | 5383  | 12513 | 6115  | 11441 |
| 185 | 10315 | 9535  | 4228  | 311   | 10401 |
| 186 | 10986 | 10212 | 3693  | 7046  | 6099  |
| 187 | 3650  | 8275  | 8108  | 425   | 8843  |
| 188 | 4968  | 11828 | 748   | 1782  | 1192  |
| 189 | 9001  | 3405  | 6600  | 1245  | 9927  |
| 190 | 11255 | 6099  | 12395 | 12026 | 10722 |
| 191 | 7879  | 4174  | 10925 | 3287  | 881   |
| 192 | 10614 | 7368  | 5727  | 6852  | 5853  |
| 193 | 1118  | 9660  | 92    | 2018  | 5793  |
| 194 | 9492  | 8829  | 11139 | 5819  | 9069  |
| 195 | 1691  | 6667  | 12429 | 2244  | 2148  |
| 196 | 3224  | 5594  | 3509  | 5735  | 12513 |
| 197 | 3346  | 3509  | 4233  | 4111  | 5018  |

---

|     |      |      |       |       |      |
|-----|------|------|-------|-------|------|
| 198 | 6482 | 7074 | 9535  | 12306 | 5949 |
| 199 | 8823 | 6102 | 2406  | 11281 | 4251 |
| 200 | 9239 | 6629 | 10472 | 4379  | 1630 |

Table S4: Top 200 genes selected by MIC(X;Y) from Breast erpos.

| No. | Gene Symbol | No. | Gene Symbol | No. | Gene Symbol | No. | Gene Symbol |
|-----|-------------|-----|-------------|-----|-------------|-----|-------------|
| 1   | ESR1        | 51  | VGLL1       | 101 | GBP1        | 151 | STK39       |
| 2   | CA12        | 52  | KIF5C       | 102 | CDKN2A      | 152 | MRPS30      |
| 3   | CA12        | 53  | CRIP1       | 103 | CPB1        | 153 | ESR1        |
| 4   | CA12        | 54  | ANXA9       | 104 | FAM174B     | 154 | LPIN1       |
| 5   | GATA3       | 55  | COX6C       | 105 | ANXA9       | 155 | SALL2       |
| 6   | AGR2        | 56  | GBP1        | 106 | FOXC1       | 156 | MUC1        |
| 7   | TBC1D9      | 57  | IL6ST       | 107 | ELF5        | 157 | WWTR1       |
| 8   | NAT1        | 58  | IGFBP4      | 108 | RABEP1      | 158 | FNDC3B      |
| 9   | CA12        | 59  | MED13L      | 109 | PRSS23      | 159 | MIA         |
| 10  | GFRA1       | 60  | KDM4B       | 110 | OGFRL1      | 160 | MIR6872     |
| 11  | CA12        | 61  | EGFR        | 111 | SLC1A4      | 161 | SFRP1       |
| 12  | GATA3       | 62  | ELF5        | 112 | CCDC170     | 162 | SERPINB5    |
| 13  | GATA3       | 63  | DACH1       | 113 | SMCO4       | 163 | UBE2D4      |
| 14  | DNAJC12     | 64  | ESR1        | 114 | PDZK1       | 164 | C9orf116    |
| 15  | TFF1        | 65  | MAPT        | 115 | KRT23       | 165 | CXCL12      |
| 16  | TBC1D9      | 66  | TTC39A      | 116 | NDRG1       | 166 | TRIM2       |
| 17  | SLC39A6     | 67  | SPDEF       | 117 | FUT8        | 167 | FRAT1       |
| 18  | SLC39A6     | 68  | GOLM1       | 118 | ALCAM       | 168 | SLC6A14     |
| 19  | IL6ST       | 69  | TRIM29      | 119 | MAPT        | 169 | GUSBP3      |
| 20  | TFF3        | 70  | KDM4B       | 120 | ARHGAP35    | 170 | WWP1        |
| 21  | ABAT        | 71  | CDH3        | 121 | ESR1        | 171 | TTYH1       |
| 22  | MLPH        | 72  | KRT6B       | 122 | KRT16       | 172 | REPS2       |
| 23  | FOXA1       | 73  | THBS1       | 123 | CHI3L1      | 173 | SPDEF       |
| 24  | ERBB4       | 74  | IGF1R       | 124 | AR          | 174 | GJA1        |
| 25  | MAPT        | 75  | METRNL      | 125 | LPIN1       | 175 | LCN2        |
| 26  | VAV3        | 76  | ROPN1B      | 126 | KCNK15      | 176 | KRT7        |
| 27  | ADIRF       | 77  | CSRP2       | 127 | VAV3        | 177 | LDLRAD4     |
| 28  | IL6ST       | 78  | EN1         | 128 | LAMP3       | 178 | BLVRA       |
| 29  | ABAT        | 79  | AFF3        | 129 | P4HTM       | 179 | TELO2       |
| 30  | IGF1R       | 80  | DNALI1      | 130 | TCEAL1      | 180 | MIR4680     |
| 31  | GABRP       | 81  | UGCG        | 131 | HLA-F       | 181 | IKBKB       |
| 32  | RARRES1     | 82  | RET         | 132 | SEMA3F      | 182 | SERPINE2    |
| 33  | XBP1        | 83  | CYP2B6      | 133 | SYT1        | 183 | HSD17B4     |
| 34  | ELOVL2      | 84  | ENPP1       | 134 | BTG3        | 184 | DECR2       |
| 35  | SYBU        | 85  | C16orf45    | 135 | PRNP        | 185 | GSTP1       |
| 36  | CELSR1      | 86  | NME3        | 136 | BTG3        | 186 | LAPTM4B     |
| 37  | C6orf211    | 87  | SCRG1       | 137 | MID1        | 187 | MED13L      |

|    |          |     |          |     |          |     |          |
|----|----------|-----|----------|-----|----------|-----|----------|
| 38 | EVL      | 88  | GREB1    | 138 | TPBG     | 188 | SERPINA5 |
| 39 | SCUBE2   | 89  | PROM1    | 139 | IRS1     | 189 | PRLR     |
| 40 | CYP2B6   | 90  | FBP1     | 140 | CIRBP    | 190 | GALNT6   |
| 41 | NKAIN1   | 91  | MMP7     | 141 | PLAGL1   | 191 | KCNE4    |
| 42 | FAM171A1 | 92  | WWP1     | 142 | BCAM     | 192 | FZD7     |
| 43 | RARRES1  | 93  | DACH1    | 143 | PBX1     | 193 | PKP1     |
| 44 | UGCG     | 94  | NME5     | 144 | LAMB2    | 194 | PNPLA4   |
| 45 | IL6ST    | 95  | TOX3     | 145 | GPM6B    | 195 | PADI2    |
| 46 | RHOB     | 96  | RAB26    | 146 | PLAT     | 196 | MCCC2    |
| 47 | SCCPDH   | 97  | CYP2B7P  | 147 | CLIC4    | 197 | PBX1     |
| 48 | RARRES1  | 98  | ADCY1    | 148 | ASS1     | 198 | EEF1A2   |
| 49 | MAGED2   | 99  | KIAA1324 | 149 | C1orf106 | 199 | SLC16A6  |
| 50 | MYB      | 100 | ZNF552   | 150 | IFRD1    | 200 | SFRP1    |

Table S5: Top 200 genes selected by  $MIC(X_1;X_2;Y)$  from Breast erpos.

| No. | Gene Symbol 1 | Gene Symbol 2 | No. | Gene Symbol 1 | Gene Symbol 2 |
|-----|---------------|---------------|-----|---------------|---------------|
| 1   | SPDEF         | TRIT1         | 51  | ESR1          | PLAUR         |
| 2   | LPIN1         | BRF2          | 52  | SCCPDH        | CREB3L2       |
| 3   | CEP170        | C5orf30       | 53  | SCCPDH        | PTPN14        |
| 4   | CXorf40B      | CEP55         | 54  | UGP2          | PTP4A2        |
| 5   | SSH3          | KLF11         | 55  | STMN1         | BCL2L1        |
| 6   | CD63          | CSTB          | 56  | PBX1          | APP           |
| 7   | SCCPDH        | IQCJ-SCHIP1   | 57  | LPIN1         | TLE3          |
| 8   | WWP1          | FAM60A        | 58  | MAGED2        | AIMP2         |
| 9   | SSH3          | DSC2          | 59  | DBI           | RABEP1        |
| 10  | PAPSS1        | ERBB2         | 60  | SCCPDH        | CYP7B1        |
| 11  | PDIA6         | KIAA0232      | 61  | PDIA6         | PTP4A2        |
| 12  | AGFG1         | MREG          | 62  | CREB3L2       | SLC7A8        |
| 13  | PDIA6         | COMMD10       | 63  | CREB3L2       | LRBA          |
| 14  | PTP4A2        | ENO1          | 64  | TRIP13        | MCCC2         |
| 15  | ADCY9         | TLDC1         | 65  | SHFM1         | MAGED2        |
| 16  | EIF5B         | KDM4B         | 66  | MLXIP         | KDM4B         |
| 17  | PRDX3         | PSME4         | 67  | CLCN3         | RRM2          |
| 18  | PSME4         | CRNKL1        | 68  | COPZ2         | SMCO4         |
| 19  | SSH3          | UPF3B         | 69  | IGF1R         | TAF11         |
| 20  | APP           | GLUL          | 70  | ANKRA2        | FAM60A        |
| 21  | CYB5R1        | TLDC1         | 71  | PTP4A2        | AGFG1         |
| 22  | PDIA6         | PTP4A2        | 72  | HMGN1         | TSPAN1        |
| 23  | SEPHS1        | CRNKL1        | 73  | ACP1          | METRNL        |
| 24  | CLUH          | KDM4B         | 74  | SPDEF         | NT5DC2        |
| 25  | BRPF1         | SPDEF         | 75  | CDC45         | KAT6B         |
| 26  | PJA2          | SERBP1        | 76  | SCCPDH        | MAFG          |
| 27  | PDIA6         | MAGED2        | 77  | IL15RA        | JADE2         |



|    |         |          |     |          |          |
|----|---------|----------|-----|----------|----------|
| 28 | EFCAB14 | TUBB6    | 78  | EGFR     | SLC25A20 |
| 29 | HMGA1   | PTP4A2   | 79  | SIAH2    | KIF2C    |
| 30 | COX8A   | HMGA1    | 80  | TUBB3    | TSPAN13  |
| 31 | IGF1R   | TTC13    | 81  | SERBP1   | PTP4A2   |
| 32 | SOS1    | CXorf40B | 82  | ESR1     | LGALS1   |
| 33 | HNRNPA1 | PSME4    | 83  | AK6      | GLG1     |
| 34 | GPN1    | ORMDL2   | 84  | TLL4     | PEX11A   |
| 35 | PTDSS1  | OCEL1    | 85  | PBX1     | TLDC1    |
| 36 | MAGED2  | RHEB     | 86  | PTDSS1   | PROSC    |
| 37 | ABCA3   | TLDC1    | 87  | KAT6B    | MICALL1  |
| 38 | EGFR    | HDAC11   | 88  | TM9SF1   | BTG3     |
| 39 | MED13L  | TRIM2    | 89  | PFN2     | SPDEF    |
| 40 | ZNF467  | TCF7L1   | 90  | XPC      | LPIN1    |
| 41 | TPX2    | GIN1     | 91  | SKP1     | PDIA6    |
| 42 | IGF1R   | PTPN14   | 92  | BTG2     | STEAP3   |
| 43 | SCCPDH  | MFN1     | 93  | IGF1R    | ZNHIT6   |
| 44 | SCCPDH  | NAB1     | 94  | AFF3     | RALGDS   |
| 45 | HMGA1   | MZT2A    | 95  | IGF1R    | DLX5     |
| 46 | USP13   | SPDEF    | 96  | HMGA1    | HMGN2    |
| 47 | CDC37   | KDM4B    | 97  | KIAA0100 | YEATS2   |
| 48 | NCK2    | HNRNPDL  | 98  | YWHAQ    | PANK3    |
| 49 | BBS1    | TCF7L1   | 99  | CREBL2   | NCK2     |
| 50 | MED13L  | HJURP    | 100 | CREBL2   | SMCO4    |

Table S6: Top 200 genes selected by MIC(X;Y) from Breast pcr.

| No. | Gene Symbol | No. | Gene Symbol | No. | Gene Symbol  | No. | Gene Symbol |
|-----|-------------|-----|-------------|-----|--------------|-----|-------------|
| 1   | MAPT        | 51  | TLR5        | 101 | IGKV1OR2-108 | 151 | RARRES1     |
| 2   | CA12        | 52  | CD58        | 102 | PVALB        | 152 | VSIG4       |
| 3   | FZD7        | 53  | KLK11       | 103 | PSMD1        | 153 | UNG         |
| 4   | FOXC1       | 54  | RBKS        | 104 | LBR          | 154 | SLC17A5     |
| 5   | CA12        | 55  | SFTPBP      | 105 | FBL          | 155 | TAPT1       |
| 6   | TPGS2       | 56  | BEND5       | 106 | TTK          | 156 | GADD45GIP1  |
| 7   | CBFA2T3     | 57  | N4BP2L2     | 107 | MDK          | 157 | PICALM      |
| 8   | FABP5       | 58  | EXOGL       | 108 | GATA3        | 158 | SCGB1D2     |
| 9   | BMI1        | 59  | ZNF131      | 109 | ABAT         | 159 | SF3B3       |
| 10  | GBP1        | 60  | RARRES1     | 110 | SETD1B       | 160 | MZF1        |
| 11  | BC069756    | 61  | STT3A       | 111 | PKP1         | 161 | GREB1       |
| 12  | MFGE8       | 62  | MSMB        | 112 | BTG3         | 162 | CYP2B7P     |
| 13  | GLYR1       | 63  | PRPSAP1     | 113 | NFIB         | 163 | TMOD3       |
| 14  | ESR1        | 64  | ATP5L       | 114 | MAPK1IP1L    | 164 | RHOB        |
| 15  | GTPBP8      | 65  | NSDHL       | 115 | FBXW11       | 165 | KCNAB1      |
| 16  | SRSF7       | 66  | ERBB2       | 116 | SMYD3        | 166 | ALG11       |
| 17  | MAN1A1      | 67  | SMARCC1     | 117 | HN1L         | 167 | C7orf26     |

|    |          |     |          |     |          |     |               |
|----|----------|-----|----------|-----|----------|-----|---------------|
| 18 | ZNF492   | 68  | PDLIM3   | 118 | VPS16    | 168 | HCLS1         |
| 19 | PGR      | 69  | BAG6     | 119 | TMEM45A  | 169 | NFIB          |
| 20 | MIR1204  | 70  | PRRC2B   | 120 | GMPS     | 170 | LPCAT4        |
| 21 | RREB1    | 71  | IGK      | 121 | CBLB     | 171 | RP11-714L20.1 |
| 22 | GOLGA8A  | 72  | PJA2     | 122 | KCTD3    | 172 | IL6ST         |
| 23 | PLD1     | 73  | HOXA1    | 123 | DCTN4    | 173 | UNC93A        |
| 24 | DCTN1    | 74  | IPO9     | 124 | NAT1     | 174 | UPF2          |
| 25 | BTG3     | 75  | TGFBR2   | 125 | NFIB     | 175 | SPATA31C2     |
| 26 | ALOXE3   | 76  | TM4SF1   | 126 | TMEM158  | 176 | CENPE         |
| 27 | RPL5     | 77  | PDSS1    | 127 | SOX4     | 177 | GATA3         |
| 28 | C4A      | 78  | SRP72    | 128 | MED17    | 178 | EIF4A1        |
| 29 | HRASLS   | 79  | ERBB4    | 129 | KLRD1    | 179 | IGHG1         |
| 30 | CEP55    | 80  | NFIB     | 130 | PTP4A2   | 180 | IFNGR1        |
| 31 | NFIB     | 81  | UBE2L6   | 131 | POU5F1P4 | 181 | CEACAM1       |
| 32 | GPM6B    | 82  | NPAT     | 132 | TBC1D1   | 182 | TIPARP        |
| 33 | PLCH2    | 83  | STC1     | 133 | SPRY4    | 183 | LOXL2         |
| 34 | ADCY9    | 84  | KHDRBS3  | 134 | SAA3P    | 184 | ALDOA         |
| 35 | NFYA     | 85  | KIAA0141 | 135 | USP2     | 185 | RNF114        |
| 36 | C18orf32 | 86  | AK021933 | 136 | LILRA1   | 186 | METRNL        |
| 37 | SHB      | 87  | DBT      | 137 | TRPC6    | 187 | PFKP          |
| 38 | COL8A1   | 88  | SCRG1    | 138 | PPIP5K2  | 188 | CYP2A7        |
| 39 | SUN1     | 89  | IGHM     | 139 | CACNB3   | 189 | AAGAB         |
| 40 | IRF5     | 90  | SYNJ1    | 140 | AK022030 | 190 | DESI2         |
| 41 | ITGB4    | 91  | NUDT6    | 141 | LDB2     | 191 | TIMM17A       |
| 42 | HMGB1    | 92  | DSTN     | 142 | EEA1     | 192 | NF1           |
| 43 | IL13RA1  | 93  | CCHCR1   | 143 | WDR11    | 193 | BICD2         |
| 44 | BID      | 94  | KCNN3    | 144 | NEFL     | 194 | PNPO          |
| 45 | IDUA     | 95  | AVPI1    | 145 | TMSB15A  | 195 | HPCAL4        |
| 46 | DESI2    | 96  | RPL10L   | 146 | RTN1     | 196 | CT55          |
| 47 | JAM2     | 97  | TWSG1    | 147 | GFRA1    | 197 | ZNF750        |
| 48 | CCNB2    | 98  | SYBU     | 148 | ERBB4    | 198 | ADRA2A        |
| 49 | LAMB4    | 99  | PLAUR    | 149 | C1GALT1  | 199 | GATA3         |
| 50 | NCAM1    | 100 | SCUBE2   | 150 | IRF1     | 200 | ZNF44         |

Table S7: Top 200 genes selected by MIC( $X_1;X_2;Y$ ) from Breast pcr.

| No. | Gene Symbol 1 | Gene Symbol 2 | No. | Gene Symbol 1 | Gene Symbol 2 |
|-----|---------------|---------------|-----|---------------|---------------|
| 1   | SLC26A2       | PNMT          | 51  | IFI35         | COPZ1         |
| 2   | TP53BP1       | RPP40         | 52  | SPINT1        | PRR13         |
| 3   | APOBEC3B      | BRMS1         | 53  | ESR1          | HJURP         |
| 4   | ZNF189        | SPDEF         | 54  | CYB5A         | RBM8A         |
| 5   | GOT2          | RB1CC1        | 55  | HMGCL         | AK4           |
| 6   | SPDEF         | LAP3          | 56  | DDX3X         | SPDEF         |
| 7   | PUM2          | FAM222B       | 57  | BCL11A        | LOC100652930  |

---

|    |          |              |     |         |          |
|----|----------|--------------|-----|---------|----------|
| 8  | MLF1     | ZNF395       | 58  | GORASP2 | FAM13B   |
| 9  | AHNAK2   | NAA15        | 59  | CALU    | SLTM     |
| 10 | MIOS     | SERHL2       | 60  | COL5A1  | TSR3     |
| 11 | TBC1D9   | YTHDF2       | 61  | TSPAN1  | VPS54    |
| 12 | DBI      | ANAPC13      | 62  | TMSB15A | SMPD1    |
| 13 | FIBP     | SP110        | 63  | PPP1CB  | SAP18    |
| 14 | SSH3     | DNMT1        | 64  | QPRT    | GREM1    |
| 15 | STAG2    | SPDEF        | 65  | ACTN1   | RABEP2   |
| 16 | SSH3     | PAPD7        | 66  | GPR4    | MUC1     |
| 17 | KDELR2   | PJA2         | 67  | CPE     | PAIP1    |
| 18 | DDIT4    | GORASP1      | 68  | PCYT2   | WNK1     |
| 19 | EIF1AX   | CYB5A        | 69  | CALU    | GEMIN2   |
| 20 | GALNT7   | FAM208B      | 70  | CEP152  | VGLL1    |
| 21 | AP1M2    | IQCG         | 71  | TEAD4   | GEMIN2   |
| 22 | ENO2     | ACACA        | 72  | UBA2    | SPDEF    |
| 23 | SLC2A3   | NME3         | 73  | DUSP14  | NDUFB6   |
| 24 | PPP1CB   | GATAD1       | 74  | CPE     | PNO1     |
| 25 | EPS8L1   | IL17RC       | 75  | GALNT10 | ZNF232   |
| 26 | UBE2D1   | LOC101928378 | 76  | B4GALT5 | KIAA1324 |
| 27 | RASGRP3  | SERHL2       | 77  | SPDEF   | LAP3     |
| 28 | CELSR2   | IL17RB       | 78  | MMP11   | SNAPC3   |
| 29 | THBS1    | C6orf106     | 79  | CDK12   | DCAF7    |
| 30 | PLCB4    | HFE          | 80  | YIPF2   | WNK1     |
| 31 | CREB3L1  | SOBP         | 81  | SSH3    | CDK3     |
| 32 | BIK      | ING1         | 82  | IDH3G   | ASL      |
| 33 | SSH3     | RSRC2        | 83  | SSH3    | TUG1     |
| 34 | KYNU     | SLC6A8       | 84  | DLK1    | NFATC1   |
| 35 | GCHFR    | TM4SF1       | 85  | SLC26A2 | PAX9     |
| 36 | CTNNAL1  | SPRY4        | 86  | SMURF2  | PDC      |
| 37 | LGALS1   | LDOC1        | 87  | JOSD1   | IGF1R    |
| 38 | PLD2     | FAM114A1     | 88  | TECR    | IFI35    |
| 39 | WIPF2    | RPL22        | 89  | NEO1    | SP110    |
| 40 | MT2A     | OAZ1         | 90  | PSMD8   | ITPR1    |
| 41 | GBP1     | ASAH1        | 91  | COL1A1  | CFLAR    |
| 42 | TMSB15A  | HLA-DOA      | 92  | PNMT    | BCL11A   |
| 43 | SLC25A36 | MSL1         | 93  | TES     | FBXL5    |
| 44 | SDC1     | MYLK         | 94  | SLC26A2 | RALGAPB  |
| 45 | TOPORS   | CYB5A        | 95  | ZBTB20  | HRASLS   |
| 46 | CRCP     | GLS2         | 96  | IFI35   | LMCD1    |
| 47 | CIB1     | DROSHA       | 97  | PPFIA1  | NCAPG    |
| 48 | CREB3    | MFN1         | 98  | RRBP1   | CCPG1    |
| 49 | GYG1     | PGAP3        | 99  | DYRK1B  | SLC26A2  |
| 50 | DLK1     | KIF4A        | 100 | B4GALT7 | RPL39L   |

---
